# Supplementary material for: Anticoagulation and Transjugular Intrahepatic Portosystemic Shunting for Treatment of Portal Vein Thrombosis in Cirrhosis: A Systematic Review and Meta-Analysis
Source: PubMed Central journal article supplement — Clin Appl Thromb Hemost. 2019 Nov 15;25:1076029619888026. doi: 10.1177/1076029619888026 (PMC7649874; doi:10.1177/1076029619888026), 2019-11-15
Supplement: TableS1.pdf [file TableS1.pdf]

Supplemental Table 1. Risk of bias assessment with Newcastle-Ottawa scale for observational studies.

| Observational Studies: Newcastle-Ottawa Scale |                 |                     |               |
|-----------------------------------------------|-----------------|---------------------|---------------|
| Author and Publication Year                   | Selection (0-4) | Comparability (0-2) | Outcome (0-3) |
| Chen 2016                                     | ■ ■ ■ ■         | ■                   | ■ ■           |
| Francoz 2005                                  | ■ ■ ■ ■         | ■ ■                 | ■ ■           |
| D'Avola 2012                                  | ■ ■ ■ ■         |                     | ■             |
| Chung 2014                                    | ■ ■ ■ ■         | ■ ■                 | ■ ■           |
| Senzolo 2012                                  | ■ ■ ■           |                     | ■ ■ ■         |
