# Supplementary material for: Anticoagulation and Transjugular Intrahepatic Portosystemic Shunting for Treatment of Portal Vein Thrombosis in Cirrhosis: A Systematic Review and Meta-Analysis
Source: PubMed Central journal article supplement — Clin Appl Thromb Hemost. 2019 Nov 15;25:1076029619888026. doi: 10.1177/1076029619888026 (PMC7649874; doi:10.1177/1076029619888026), 2019-11-15
Supplement: TableS2.pdf [file TableS2.pdf]

Supplemental Table 2. Cochrane Risk of Bias assessment for included clinical trials.

| Randomized Controlled Trials: Cochrane Collaboration Tool |                                             |                                         |                                                           |                                                 |                                          |                                      |            |
|-----------------------------------------------------------|---------------------------------------------|-----------------------------------------|-----------------------------------------------------------|-------------------------------------------------|------------------------------------------|--------------------------------------|------------|
| Author and Publication Year                               | Random sequence generation (selection bias) | Allocation concealment (selection bias) | Blinding of participants and personnel (performance bias) | Blinding of outcome assessment (detection bias) | Incomplete outcome data (attrition bias) | Selective reporting (reporting bias) | Other bias |
| Lv 2017                                                   | Low Risk                                    | High Risk                               | Low Risk                                                  | High Risk                                       | Low Risk                                 | Unclear Risk                         | Low Risk   |
| Luo 2015                                                  | Low Risk                                    | Unclear Risk                            | Low Risk                                                  | High Risk                                       | Low Risk                                 | Unclear Risk                         | Low Risk   |
